# Supplementary material for: Multistage Detection of Tetrodotoxin Traces in Diodon hystrix Collected in El Salvador
Source: MDPI journal article supplement (doi:10.3390/toxins15070409), 2023-06-25
Supplement: s1 [file s1]

# Supplementary Materials

## Multistage detection of Tetrodotoxin traces in *Diodon hystrix* collected in El Salvador

Juan Carlos Fuentes-Monteverde <sup>1,2,†</sup>, Marvin J. Núñez <sup>3,†</sup>, Oscar Amaya-Monterosa <sup>4</sup>,  
Morena L. Martínez <sup>3</sup>, Jaime Rodríguez <sup>1,\*</sup> and Carlos Jiménez <sup>1,\*</sup>

<sup>1</sup> CICA—Centro Interdisciplinar de Química e Biología and Departamento de Química, Facultad de Ciencias, Universidade da Coruña, 15071 A Coruña, Spain; jufu@mpinat.mpg.de

<sup>2</sup> NMR Based Structural Biology, MPI for Multidisciplinary Sciences, Am Fassberg 11, 37077 Göttingen, Germany

<sup>3</sup> Laboratorio de Investigación en Productos Naturales, Facultad de Química y Farmacia, Universidad de El Salvador, San Salvador 01101, El Salvador; marvin.nunez@ues.edu.sv (M.J.N.); morena.martinez@ues.edu.sv (M.L.M.)

<sup>4</sup> Laboratorio de Toxinas Marinas, Escuela de Física, Facultad de Ciencias Naturales y Matemática, Universidad de El Salvador, San Salvador 01101, El Salvador; oscar.amaya@ues.edu.sv

\* Correspondence: jaime.rodriguez@udc.es (J.R.); carlos.jimenez@udc.es (C.J.); Tel.: +34-881012173 (J.R.); +34-881012170 (C.J.)

† These authors contributed equally to this work.

## Contents

|                                                                                                                                                                                                                                                                                                                                                                                                                                                                                                                                                                                                                                                                                                                                                                      |    |
|----------------------------------------------------------------------------------------------------------------------------------------------------------------------------------------------------------------------------------------------------------------------------------------------------------------------------------------------------------------------------------------------------------------------------------------------------------------------------------------------------------------------------------------------------------------------------------------------------------------------------------------------------------------------------------------------------------------------------------------------------------------------|----|
| <b>Samples of <i>Diodon hystrix</i></b> .....                                                                                                                                                                                                                                                                                                                                                                                                                                                                                                                                                                                                                                                                                                                        | 4  |
| <b>Figure S1.</b> Female specimen of <i>Diodon hystrix</i> . .....                                                                                                                                                                                                                                                                                                                                                                                                                                                                                                                                                                                                                                                                                                   | 4  |
| <b>Figure S2.</b> Dissected specimens of <i>Diodon hystrix</i> . .....                                                                                                                                                                                                                                                                                                                                                                                                                                                                                                                                                                                                                                                                                               | 4  |
| <b>Sample purification</b> .....                                                                                                                                                                                                                                                                                                                                                                                                                                                                                                                                                                                                                                                                                                                                     | 4  |
| <b>Figure S3.</b> Aqueous layer ultra-filtration (Amilcon® system) of the sample (Left) and sample TTX concentration via manual pass-through a Sep-Pak Plus (C18 Cartridges) Waters (Right).....                                                                                                                                                                                                                                                                                                                                                                                                                                                                                                                                                                     | 4  |
| <b>Detection and quantification limit of HPLC-MS/MS-SRM</b> .....                                                                                                                                                                                                                                                                                                                                                                                                                                                                                                                                                                                                                                                                                                    | 5  |
| <b>Table S1.</b> Calibration curve data .....                                                                                                                                                                                                                                                                                                                                                                                                                                                                                                                                                                                                                                                                                                                        | 5  |
| <b>Figure S4.</b> TTX calibration curve for TTX of the qualitative SRM transition (320 → 302, Curve I), and the quantitative SRM transition (320 → 162, Curve II), over the calibration range used in samples of <i>D. hystrix</i> study. Linear regression curves are shown in dashed lines, slope (b) and intercept (a) are displayed with its respective standard deviations, limit of detection (LOD: 0.076 µg mL <sup>-1</sup> ) and limit of quantification (LOD: 0.32 µg mL <sup>-1</sup> ) were computed analytically from Curve I and II, indicated in the figure and the inset respectively, the statistic $S_{y/x}$ ( $S_B$ ), and the estimated standard deviation of the blank ( $S_{B-I} = 33139.83$ ; $S_{B-II} = 31105.52$ ). .....                  | 6  |
| <b>HPLC-MS/MS-SRM analysis</b> .....                                                                                                                                                                                                                                                                                                                                                                                                                                                                                                                                                                                                                                                                                                                                 | 7  |
| <b>Figure S5.</b> HPLC-MS/MS-SRM Chromatograms of TTX standard (a), and muscle undefined sample (b). Arrows show the expected transition. The expected transition ion ratio (TIR) between the two quantifications ions was not found in the sample, presumably due low sample concentration. ....                                                                                                                                                                                                                                                                                                                                                                                                                                                                    | 7  |
| <b>HPLC-HRFTMS analysis</b> .....                                                                                                                                                                                                                                                                                                                                                                                                                                                                                                                                                                                                                                                                                                                                    | 7  |
| <b>Figure S6.</b> HPLC-ESI(+)-HRMS (SIM mode) of tetrodotoxin standard. Total ion current (a), chromatogram extract mass range $m/z$ 320.00-320.20 (b) and high-resolution mass spectra (c) .....                                                                                                                                                                                                                                                                                                                                                                                                                                                                                                                                                                    | 7  |
| <b>Figure S7.</b> Total ion current of the HPLC-ESI(+)-HRFTMS (SIM mode) of FS sample of <i>D. hystrix</i> . ....                                                                                                                                                                                                                                                                                                                                                                                                                                                                                                                                                                                                                                                    | 8  |
| <b>Figure S8.</b> Isotope Abundance analysis of HPLC-ESI(+)-HRFTMS (SIM mode) study of FS sample ( <i>D. hystrix</i> ). Isotope abundace list generated by Thermo Xcalibur V 3.0 at different retention times (a). Calculation of experimental Relative Isotope Abundance ( $RIA_{exp}$ ) (b). Theoretical isotope abundace list of TTX automatically generated by ChemDraw V 20.1 (c), and calcualtion of Relative Isotope Abundance ( $RIA_{error}$ ) .....                                                                                                                                                                                                                                                                                                        | 8  |
| <b>Figure S9.</b> Overlapping of the HPLC-ESI(+)-HRFTMS extracted ion chromatogram of TTX standard (Black peak) and Female Skin (FS) sample (Red peak) under full scan. ....                                                                                                                                                                                                                                                                                                                                                                                                                                                                                                                                                                                         | 8  |
| <b>Figure S10.</b> HPLC-ESI(+)-HRFTMS (SIM mode) analysis of male liver sample of <i>D. hystrix</i> . High-resolution mass spectra at diferent retentions times (a-c) .....                                                                                                                                                                                                                                                                                                                                                                                                                                                                                                                                                                                          | 9  |
| <b>HPLC-HRFTMS<sup>2</sup> analysis</b> .....                                                                                                                                                                                                                                                                                                                                                                                                                                                                                                                                                                                                                                                                                                                        | 9  |
| <b>Figure S11.</b> HPLC-ESI(+)-HRMS <sup>2</sup> of tetrodotoxin standard, obtained on a linear-trap quadruple-Orbitrap XL MS. Extracted ion chromatogram from $m/z$ 320.00 → 302.50-301.5 (a – above). Extracted ion chromatogram from $m/z$ 320.00 → 162.50-161.50 (a – below). Fragmentation of the ion eluted at $t_R$ 28.9±0.1 min, shows the characteristic fragments at $m/z$ 302.09799 ( $\Delta m/z = 0.96$ ppm); which indicates the losing of a molecule of water on tetrodotoxin molecule (b). Second fragmentation of the ion shows the characteristic fragments at $m/z$ 162.06595 ( $\Delta m/z = 1.48$ ppm); which suggests the presents of the distinguishing group (5-8)-hydroxyquinazolin-2-amonium, commonly found in TTX fragmentation (c)..... | 9  |
| <b>Parameters of LC/MS Analysis in MZMINE V2.21</b> .....                                                                                                                                                                                                                                                                                                                                                                                                                                                                                                                                                                                                                                                                                                            | 10 |
| <b>Table S2.</b> Range of element used during Tetrodotoxin dereplication .....                                                                                                                                                                                                                                                                                                                                                                                                                                                                                                                                                                                                                                                                                       | 10 |



## Samples of *Diodon hystrix*

---

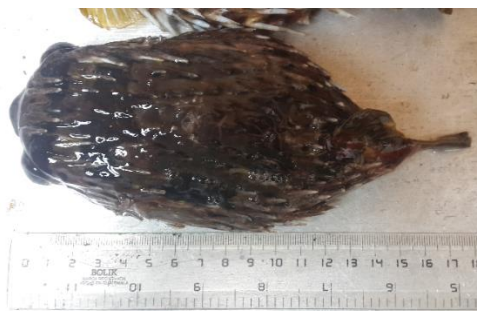

**Figure S1.** Female specimen of *Diodon hystrix*.

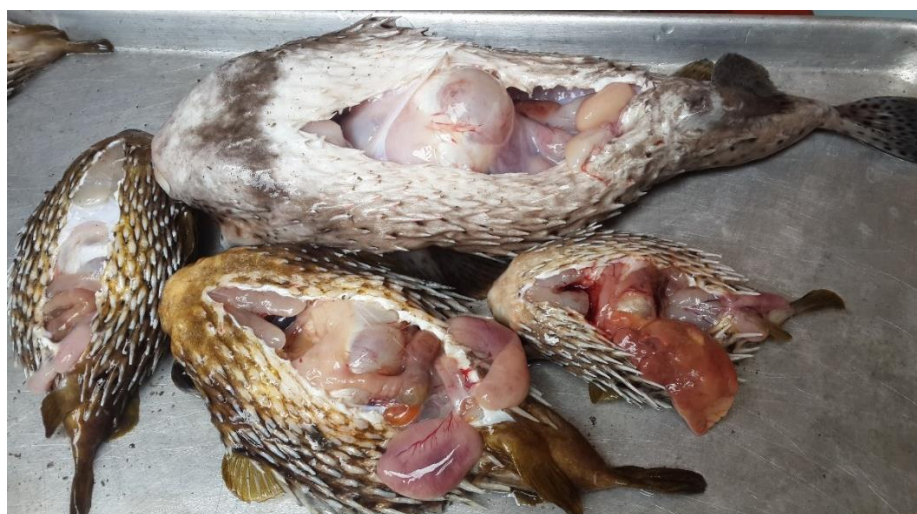

**Figure S2.** Dissected specimens of *Diodon hystrix*.

## Sample purification

---

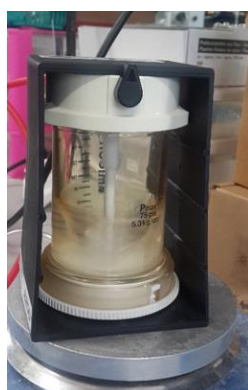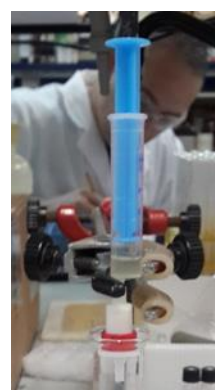

**Figure S3.** Aqueous layer ultra-filtration (Amilcon® system) of the sample (Left) and sample TTX concentration via manual pass-through a Sep-Pak Plus (C18 Cartridges) Waters (Right).

The *limit of detection* (LOD) and *quantification* (LOQ) were calculated as follows: Detection and quantification curves were built by plotting the area of both 320 → 302 and 320 → 162 transitions, over the calibration range used in samples of *D. hystrix* study; named as Curve I and Curve II respectively (See **Figure S4**). Both curves were adjusted by linear regression to the general form  $y = bx + a$ , where  $b$  is the *slope* and  $a$  is the *interceptor*. The sensitivity of the method is defined as the  $b$ . LOD was computed with the parameters derived from Curve I, while LOQ was estimated from values obtained from Curve II; using the **equations 1 and 2**, respectively. Where  $y_b$ , is the *blank signal response*, precisely estimated from the regression curve as the *interceptor* ( $a-I = 36136.57$  and  $a-II = 27978.10$ ), and  $S_b$  is the *standard deviation of the blank*, which estimates the random error in the  $y$ -direction.  $S_b$  is equal to the statistic  $S_{y/x}$  and computed by **equation 3** ( $S_{b-I} = 33139.83$  and  $S_{b-II} = 31105.52$ ). The *standard deviation of the slope* ( $S_b$ ) and *standard deviation of the intercept* ( $S_a$ ) were computed using **equations 4 and 5**, respectively. [1].

**Equation legend, in order of appearance:** LOD, is the limit of detection; LOQ, is the limit of quantification,  $y_b$ , is the blank signal response;  $S_{y/x}$  ( $S_b$ ), is the standard deviation of the blank;  $y_i$ , each of the  $m/z$  areas corresponding to the TTX serial dilution;  $\hat{y}_i$  computed  $m/z$  areas using the fitted curve ( $y = bx + a$ );  $x_i$ , each of the concentration that covers the full range of the calibration curve;  $\bar{x}$ , average of the concentration of the 9 standard samples used in the calibration curve building.  $S_b$ , is standard deviation of the slope, and  $S_a$ , is standard deviation of the interceptor

$$\begin{aligned} LOD &= y_{b-I} + 3S_{b-I} & \text{Eq. 1} \\ LOQ &= y_{b-II} + 10S_{b-II} & \text{Eq. 2} \\ S_{y/x} &= \sqrt{\frac{\sum_i (y_i - \hat{y}_i)^2}{n - 2}} & \text{Eq. 3} \\ S_b &= \frac{S_{y/x}}{\sqrt{\sum_i (x_i - \bar{x})^2}} & \text{Eq. 4} \\ S_a &= S_{y/x} \sqrt{\frac{\sum_i x_i^2}{n \sum_i (x_i - \bar{x})^2}} & \text{Eq. 5} \end{aligned}$$

**Table S1.** Calibration curve data

| Concentracion (µg/mL) | Area $m/z$ 1 | Area $m/z$ 2 | TIR               |
|-----------------------|--------------|--------------|-------------------|
| 0.0063                | 10605        | 7490         | 1.41 <sub>6</sub> |
| 0.013                 | 22757        | 16128        | 1.41 <sub>1</sub> |
| 0.025                 | 52920        | 39250        | 1.34 <sub>8</sub> |
| 0.05                  | 99870        | 71799        | 1.39 <sub>1</sub> |
| 0.1                   | 197500       | 145000       | 1.36 <sub>2</sub> |
| 0.2                   | 357800       | 268900       | 1.33 <sub>1</sub> |
| 0.6                   | 832800       | 661700       | 1.25 <sub>9</sub> |
| 0.8                   | 1060000      | 801100       | 1.32 <sub>3</sub> |
| 1.01                  | 1341000      | 991900       | 1.35 <sub>2</sub> |
|                       |              | <b>Avg.</b>  | 1.34              |
|                       |              | <b>STD.</b>  | 0.04              |
|                       |              | <b>RSE.</b>  | 3.09              |

TIR: transition ion ratio. Avg.: Average; STD.: Standard deviation; RSE.: Relative standard error. Identification criteria was established as  $\pm 15\%$  of the Avg. Quantification limit: 6.2 ng/mL, and minimum signal to noise ratio ( $s/n$ ) = 10.

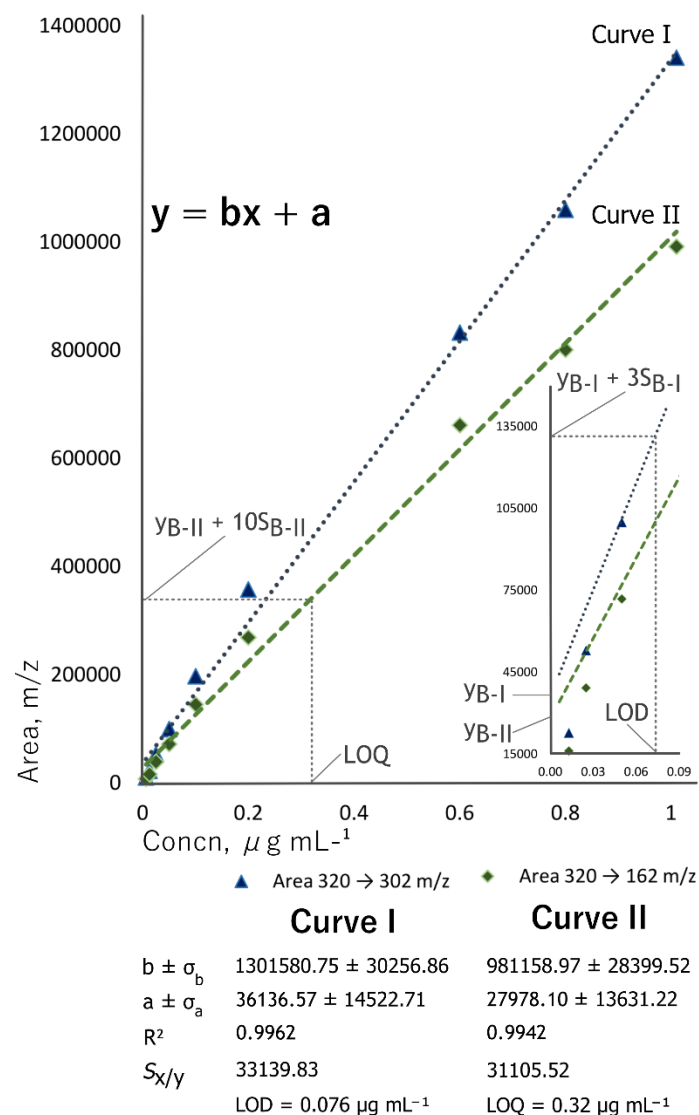

**Figure S4.** TTX calibration curve for TTX of the qualitative SRM transition (320  $\rightarrow$  302, Curve I), and the quantitative SRM transition (320  $\rightarrow$  162, Curve II), over the calibration range used in samples of *D. hystrix* study. Linear regression curves are shown in dashed lines, slope (b) and interceptor (a) are displayed with its respective standard deviations, limit of detection (LOD:  $0.076 \mu\text{g mL}^{-1}$ ) and limit of quantification (LOD:  $0.32 \mu\text{g mL}^{-1}$ ) were computed analytically from Curve I and II, indicated in the figure and the inset respectively, the statistic  $S_{y/x}$  ( $S_B$ ), and the estimated standard deviation of the blank ( $S_{B-I} = 33139.83$ ;  $S_{B-II} = 31105.52$ ).

## HPLC-MS/MS-SRM analysis

HPLC-MS/MS analysis also shows in undefined gender muscle sample (MU) ( $\Delta t_R = 0.13$ , TIR = 0.21) a transitions that subjest the presence of the toxin. TIR: transition ion ratio.

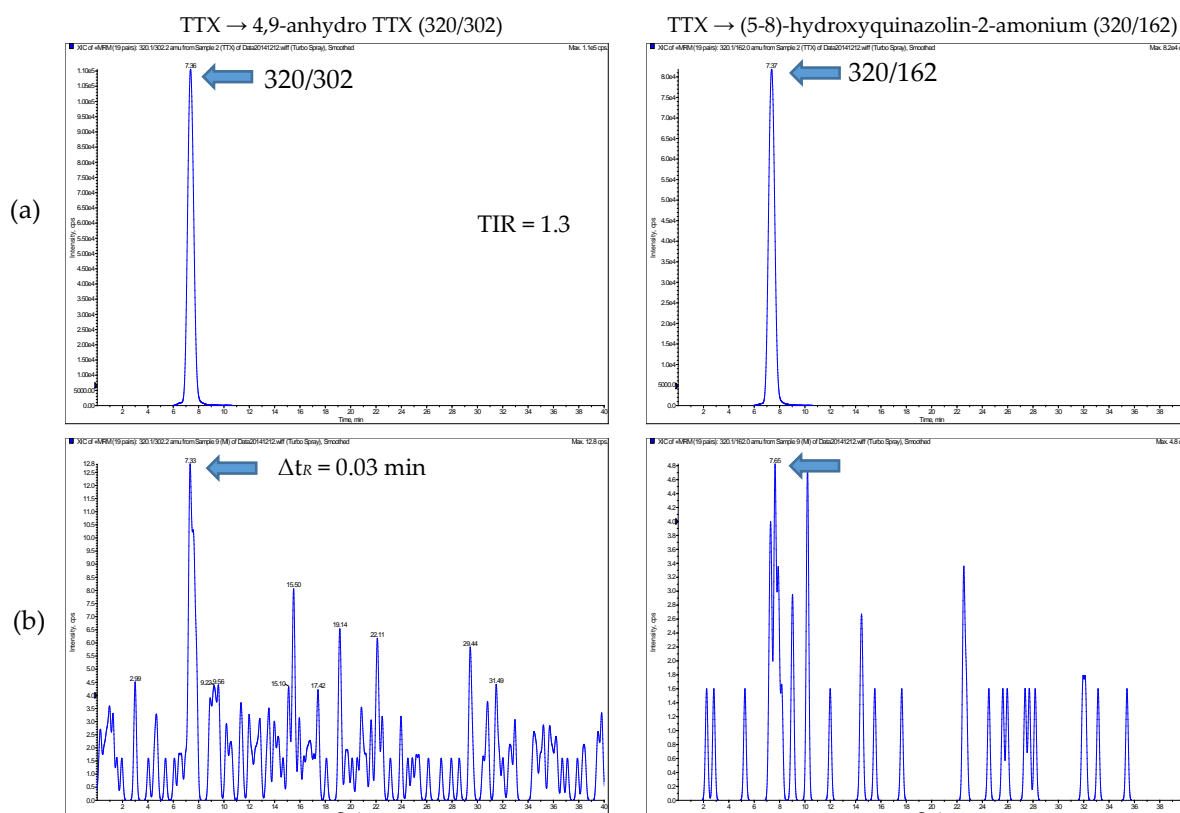

**Figure S5.** HPLC-MS/MS-SRM Chromatograms of TTX standard (a), and muscle undefined sample (b). Arrows show the expected transition. The expected transition ion ratio (TIR) between the two quantifications ions was not found in the sample, presumably due low sample concentration.

## HPLC-HRFTMS analysis

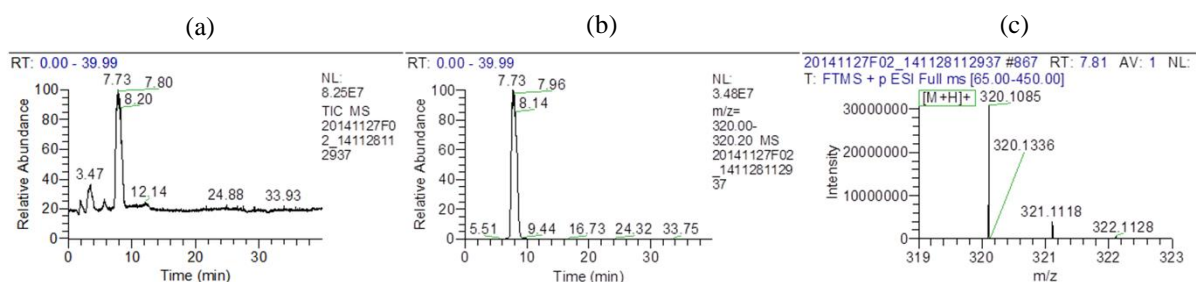

**Figure S6.** HPLC-ESI(+)-HRMS (SIM mode) of tetrodotoxin standard. Total ion current (a), chromatogram extract mass range  $m/z$  320.00-320.20 (b) and high-resolution mass spectra (c)

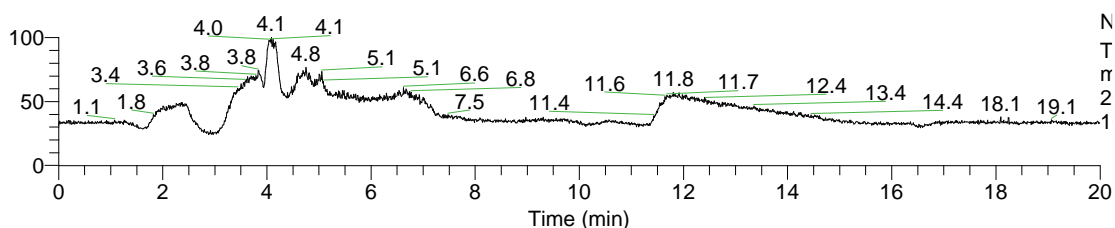

**Figure S7.** Total ion current of the HPLC-ESI(+)-HRFTMS (SIM mode) of FS sample of *D. hystrix*.

In that figure below the differences between accurate calculated mass and experimentally detected mass in ppm ( $\Delta m/z$ ) and the isotopic ion abundance ratio error (RIAerror) of M+1/M ( $^{13}\text{C}_1/^{12}\text{C}$ ) are shown

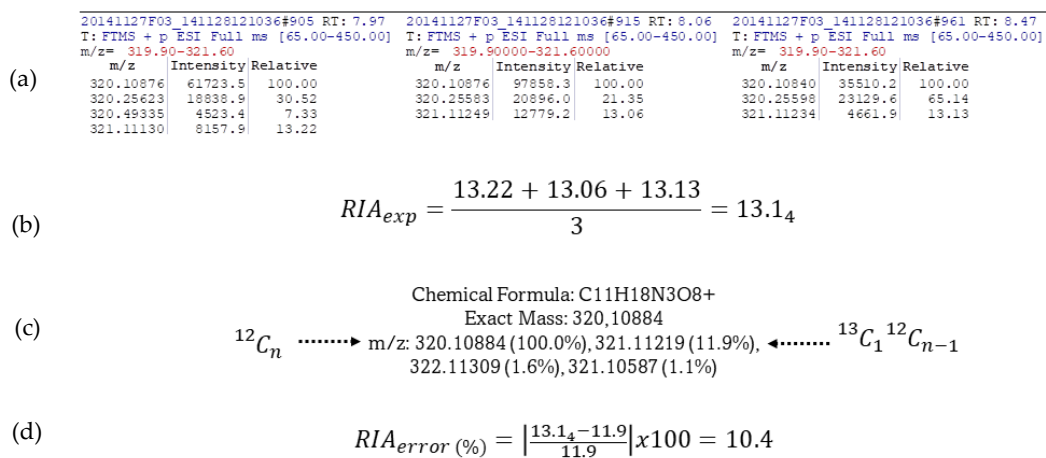

**Figure S8.** Isotope Abundance analysis of HPLC-ESI(+)-HRFTMS (SIM mode) study of FS sample (*D. hystrix*). Isotope abundance list generated by Thermo Xcalibur V 3.0 at different retention times (a). Calculation of experimental Relative Isotope Abundance ( $RIA_{exp}$ ) (b). Theoretical isotope abundance list of TTX automatically generated by ChemDraw V 20.1 (c), and calculation of Relative Isotope Abundance ( $RIA_{error}$ )

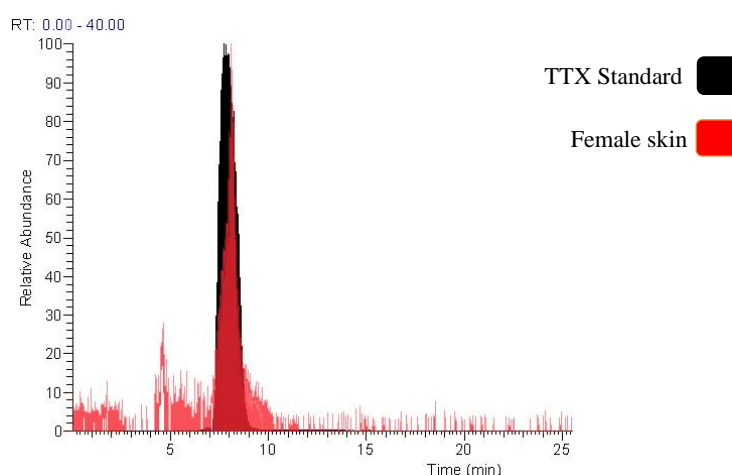

**Figure S9.** Overlapping of the HPLC-ESI(+)-HRFTMS extracted ion chromatogram of TTX standard (Black peak) and Female Skin (FS) sample (Red peak) under full scan.



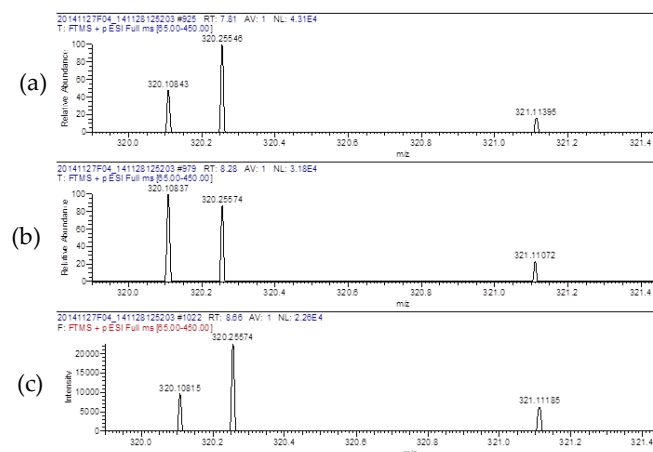

**Figure S10.** HPLC-ESI(+)-HRFTMS (*SIM* mode) analysis of male liver sample of *D. hystrix*. High-resolution mass spectra at different retention times (a-c)

## HPLC-HRFTMS<sup>2</sup> analysis

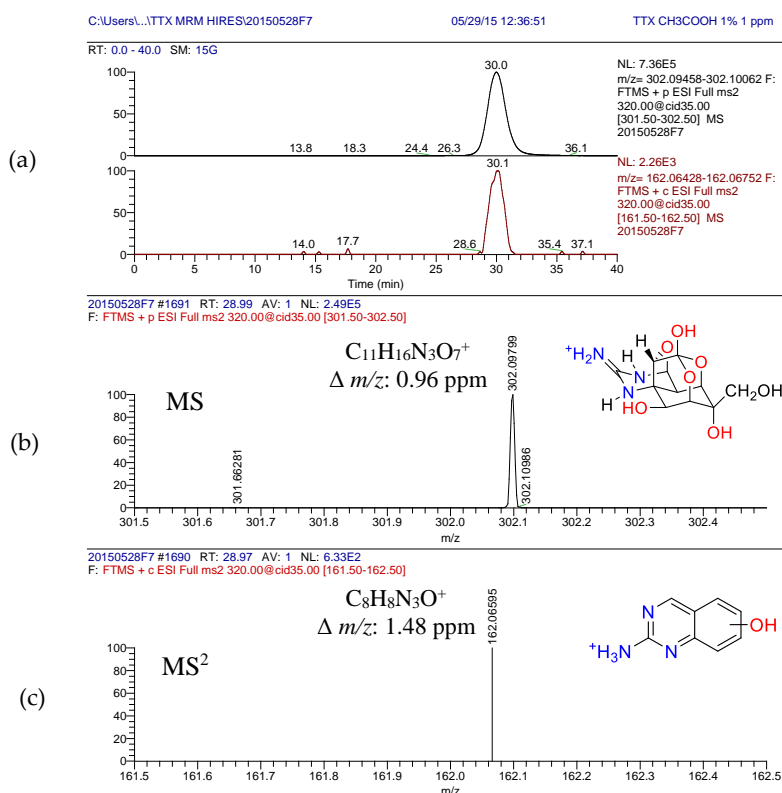

**Figure S11.** HPLC-ESI(+)-HRMS<sup>2</sup> of tetrodotoxin standard, obtained on a linear-trap quadrupole-Orbitrap XL MS. Extracted ion chromatogram from  $m/z$  320.00  $\rightarrow$  302.50-301.5 (a – above). Extracted ion chromatogram from  $m/z$  320.00  $\rightarrow$  162.50-161.50 (a – below). Fragmentation of the ion eluted at  $t_R$  28.9 $\pm$ 0.1 min, shows the characteristic fragments at  $m/z$  302.09799 ( $\Delta m/z$  = 0.96 ppm); which indicates the losing of a molecule of water on tetrodotoxin molecule (b). Second fragmentation of the ion shows the characteristic fragments at  $m/z$  162.06595 ( $\Delta m/z$  = 1.48 ppm); which suggests the presents of the distinguishing group (5-8)-hydroxyquinazolin-2-amonium, commonly found in TTX fragmentation (c).

Batch queue options Full Scan Mode and Tandem Ms/Ms (Options not indicated are understood to be blank. Mass tolerance used was fixed using two times the difference between ttx's mass detected on the standard and the calculated value). **Mass detection:** *Scans:* Retention time: Auto. MS Level: 1. Polarity Any. Spectrum type: Profile. *Mass detector:* Exact Mass. Noise level: 7E3. Note: Male Liver chromatogram were very noisy, and was necessary a more refined approach, Mass detector (*Male liver sample*): Mass detector: Wavelet transform. **TMS shoulder peaks (Only Full scan):** Mass resolution: 10000. Peak model function: Gaussian **Ms/MS peak (Only Ms/Ms tandem):** m/z range: 162-302.5. **Baseline correction:** Chromatogram type: TIC. MS level: 1. Use m/s bins: Checked. m/z bin width 1. *Correction Method:* Asymmetric baseline corrector. Smoothing: 1E4. Asymmetry: 0.001. RT & m/z range: Auto. **Chromatogram builder:** *Scans:* Retention time: 6.0-10.0 min. MS Level: 1. Polarity Any. Spectrum type: Profile. Min time span (min): 0.25. Min height: 4E3. m/z tolerance: 0.0019 m/z & 10ppm. **Chromatogram deconvolution:** *Algorithm:* Savitzky-Golay. Min peak height: 6E3. Peak duration range (min): 0.32-3.3. Derivate threshold level: 50%. **Isotopic peaks grouper:** m/z tolerance: 0.0018 or 10 ppm. Retention time tolerance: 0.2 min. Monotonic shape: checked. Maximum charge: 1. Representative isotope: **Most intense Adduct search:** RT tolerance: 0.2 min. Adducts: [M+Na]<sup>+</sup>, [M+H]<sup>+</sup>, [M+H-H<sub>2</sub>O]<sup>+</sup>, [M+ACN+H]<sup>+</sup>. m/z tolerance: 0.0016 m/z or 9 ppm. Max relative adduct peak height: 20%. **Formula predictor:** m/z tolerance: 0.0016 or 6 ppm. Values shown in the table correspond to  $\pm 20\%$  of each element present in the TTX. Phosphorus and sulfur were added in order to test the robustness of the predictor algorithm (Table 1-SI) *Element count heuristics:* all checked. *RDBE restrictions:* checked. Range: -1 to 10. RDBE must be integer. *Isotope pattern filter:* Isotope m/z tolerance: 0.002 or 10 ppm. Minimum absolute intensity: 5.0E1. Minimum score: 85%. *Ms/Ms filter:* Ms/Ms m/z tolerance: 0.0016 or 10 ppm. MS/MS score threshold: 80%. **Online database search:** *Database:* PubChem Compound Database. Charge 1. Ionization type: [M+H]<sup>+</sup>. Number of results: 10. m/z tolerance: 0.0019 or 6 ppm. *Isotope pattern filter:* m/z tolerance: 0.0015 or 5 ppm. Minimum absolute intensity 1.0E4. Minimum score: 95.5%

Table S2. Range of element used during Tetrodotoxin dereplication

| Element    | Minimum number of atoms searched | Maximum number of atoms searched |
|------------|----------------------------------|----------------------------------|
| Carbon     | 9                                | 13                               |
| Phosphorus | 0                                | 1                                |
| Nitrogen   | 2                                | 4                                |
| Hydrogen   | 13                               | 20                               |
| Oxygen     | 7                                | 9                                |
| Sulphur    | 0                                | 2                                |

Sulphur and Phosphorus have been included in order to test the robustness of empirical formula predictor.

## References

1. Miller, J.N.; Miller, J.C.; Miller, R.D. *Statistics and chemometrics for analytical chemistry*, Seventh edition ed.; Pearson Education Limited: Harlow, United Kingdom, 2018.
